# Supplementary material
Source: Springer Nature journal article supplement (https://www.springermedizin.de/resource/supplementary/12889_2011_5015_MOESM4_ESM.pdf/9490536)

FG topic of discussion/major theme

**A minimum price policy might make matters worse**

**Maximizing the acceptability of a minimum price policy**

Primary themes

**Increases in crime**

**Increases in drug abuse**

**Negative economic impact**

**Minimum price as part of a broader policy 'package'**

**Revenues should fund other interventions**

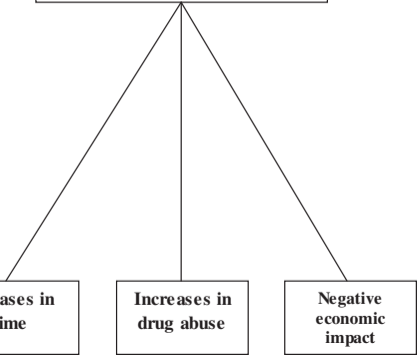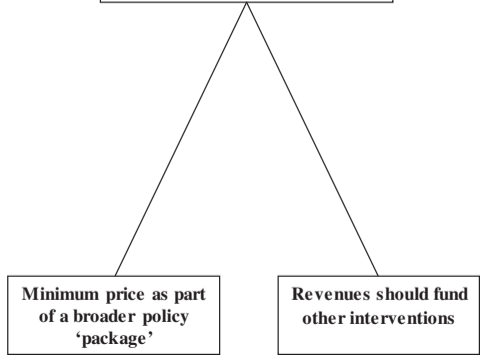

Supplement: MOESM4 [file 9490536]
